# Supplementary material for: Alternative splicing of helicase-like transcription factor (Hltf): Intron retention-dependent activation of immune tolerance at the feto-maternal interface
Source: PLOS journal article supplement (doi:10.1371/journal.pone.0200211), 2018-07-05
Supplement: S2 (10.1371/journal.pone.0200211.s002) [file journal.pone.0200211.s002]

S1 Table Sample quality control and RNA-seq outcome.

| Sample ID | OD260/280 | RIN | Total Bases   | Total Reads | Mapped Reads |
|-----------|-----------|-----|---------------|-------------|--------------|
| 1-Control | 2.13      | 7.4 | 3,389,172,000 | 33,891,720  | 58.08%       |
| 2-Control | 2.11      | 7.6 | 4,010,136,800 | 40,101,368  | 50.29%       |
| 3-Control | 2.10      | 8.0 | 4,156,136,800 | 41,561,368  | 51.83%       |
| 4-Control | 2.13      | 8.2 | 3,129,473,400 | 31,294,734  | 62.31%       |
| 5-Control | 2.09      | 7.1 | 3,422,688,400 | 34,226,884  | 58.97%       |
| 6-Null    | 2.11      | 8.1 | 3,322,239,000 | 33,222,390  | 56.45%       |
| 7-Null    | 2.10      | 8.9 | 3,652,915,400 | 36,529,154  | 47.91%       |
| 8-Null    | 2.11      | 8.4 | 3,291,146,000 | 32,911,460  | 52.59%       |
| 9-Null    | 2.12      | 8.3 | 4,017,065,800 | 40,170,658  | 54.39%       |
| 10-Null   | 2.11      | 8.3 | 3,196,424,400 | 31,964,244  | 43.99%       |

An RNA integrity number (RIN) from an Agilent Bioanalyzer within the range of 7-10 indicates high RNA sample quality.
